# Supplementary material for: A facile access to [60]fullerene-fused δ-lactones: unexpected reaction pathway of benzenediazonium-2-carboxylates controlled by organic bases
Source: Royal Society of Chemistry journal article supplement (doi:10.1039/b820395d), 2009-01-01

## Supplementary Material

### A Facile Access to [60]Fullerene-Fused $\delta$ -Lactones: Unexpected Reaction Pathway of Benzenediazonium-2-carboxylates Controlled by Organic Bases

Guan-Wu Wang<sup>\*,a,b</sup> and Bo Zhu<sup>a</sup>

<sup>a</sup> Hefei National Laboratory for Physical Sciences at Microscale and Department of Chemistry, University of Science and Technology of China, Hefei, Anhui 230026, P. R. China.

<sup>b</sup> State Key Laboratory of Applied Organic Chemistry, Lanzhou University, Lanzhou, Gansu 730000, P. R. China

Tel & Fax: +86-551-360-7864

E-mail: [gwang@ustc.edu.cn](mailto:gwang@ustc.edu.cn)

General procedure for the effects of bases on the reaction of

|                                                                    |             |
|--------------------------------------------------------------------|-------------|
| C <sub>60</sub> with <b>1a</b> and isoamyl nitrite                 | page 2      |
| Experimental procedures and spectral data of products <b>2a-2d</b> | page 2 - 4  |
| NMR spectra of products <b>2a-2d</b>                               | page 5 - 12 |

**General procedure for the effect of bases on the reaction of C<sub>60</sub> with 1a and isoamyl nitrite.**

To a solution of C<sub>60</sub> (36.0 mg, 0.05 mmol) in chlorobenzene (8 mL) was sequentially added 2-amino-4,5-dimethoxybenzoic acid **1a** (49.3 mg, 0.25 mmol), the employed base (0.1 mmol) and isoamyl nitrite (40 uL, 0.3 mmol). After being stirred at 60 °C for the designated time, the reaction mixture was filtered through a silica gel plug in order to remove any insoluble material and evaporated *in vacuo*. The residue was separated on a silica gel column with carbon disulfide as the eluent to give unreacted C<sub>60</sub> and then product **3**, subsequent elution with carbon disulfide/dichloromethane afforded C<sub>60</sub>-fused lactone **2a**.

**Synthesis of C<sub>60</sub>-fused lactone 2a.**

To a solution of C<sub>60</sub> (36.0 mg, 0.05 mmol) in chlorobenzene (8 mL) was sequentially added 2-amino-4,5-dimethoxybenzoic acid **1a** (49.3 mg, 0.25 mmol), Et<sub>3</sub>N (14 uL, 0.1 mmol) and isoamyl nitrite (40 uL, 0.3 mmol). After being stirred at 60 °C for 1.5 h, the reaction mixture was filtered through a silica gel plug in order to remove any insoluble material and evaporated *in vacuo*. The residue was separated on a silica gel column with carbon disulfide as the eluent to give unreacted C<sub>60</sub> (21.8 mg, 61%), then with carbon disulfide/dichloromethane as the eluent to afford C<sub>60</sub>-fused lactone **2a** (16.8 mg, 37%).

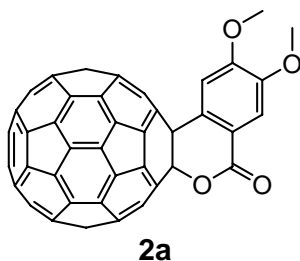

Spectral data of **2a**: <sup>1</sup>H NMR (300 MHz, CS<sub>2</sub>/CDCl<sub>3</sub>) δ 8.01 (s, 1H), 7.99 (s, 1H), 4.12 (s, 3H), 3.96 (s, 3H); <sup>13</sup>C NMR (75 MHz, CS<sub>2</sub>/CDCl<sub>3</sub> with Cr(acac)<sub>3</sub> as relaxation reagent) (all 2C unless indicated) δ 160.49 (1C, CO), 154.46 (1C, aryl C), 152.82, 149.13 (1C, aryl C), 148.18 (1C), 148.01, 147.69 (1C), 146.22, 146.16, 145.90, 145.85, 145.83, 145.28, 144.95, 144.92, 144.85, 144.42 (4C), 144.02 (4C), 142.58, 142.35, 142.30, 142.13, 142.04, 141.71, 141.55, 140.74, 140.66, 139.55, 139.40, 135.05, 134.11, 130.05 (1C, aryl C), 114.71 (1C, aryl C), 111.87 (1C, aryl C), 110.83 (1C, aryl C), 95.06 (1C, sp<sup>3</sup>-C of C<sub>60</sub>), 57.86 (1C, sp<sup>3</sup>-C of C<sub>60</sub>), 55.94 (1C, OCH<sub>3</sub>), 55.78 (1C, OCH<sub>3</sub>); FT-IR v/cm<sup>-1</sup> (KBr) 2924, 1728, 1632, 1603, 1515, 1446, 1403, 1280, 1168, 1067, 877, 774, 528; UV-vis (CHCl<sub>3</sub>) λ<sub>max</sub>/nm (log ε) 268 (4.95), 317 (4.70), 416 (3.57), 688 (2.49); MS (ESI) m/z 900. MALDI FT-ICR MS m/z calcd for C<sub>69</sub>H<sub>8</sub>O<sub>4</sub> [M<sup>-</sup>] 900.0423, found 900.0411.

**Synthesis of C<sub>60</sub>-fused lactone 2b.**

To a solution of C<sub>60</sub> (36.0 mg, 0.05 mmol) in chlorobenzene (8 mL) was sequentially

added 2-amino-benzoic acid **1b** (34.3 mg, 0.25 mmol), Et<sub>3</sub>N (14 uL, 0.1 mmol) and isoamyl nitrite (40 uL, 0.3 mmol). After being stirred at 60 °C for 1 h, the reaction mixture was filtered through a silica gel plug in order to remove any insoluble material and evaporated *in vacuo*. The residue was separated on a silica gel column with carbon disulfide as the eluent to give unreacted C<sub>60</sub> (25.3 mg, 70%), then with carbon disulfide/dichloromethane as the eluent to afford C<sub>60</sub>-fused lactone **2b** (11.4 mg, 27%).

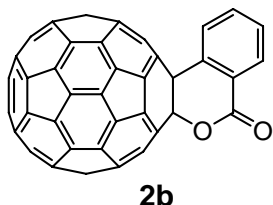

Spectral data of **2b**: <sup>1</sup>H NMR (300 MHz, CS<sub>2</sub>/CDCl<sub>3</sub>) δ 8.62 (d, *J* = 7.8 Hz, 1H), 8.57 (d, *J* = 7.8 Hz, 1H), 7.87 (t, *J* = 7.7 Hz, 1H), 7.71 (t, *J* = 7.6 Hz, 1H); <sup>13</sup>C NMR (75 MHz, CS<sub>2</sub>/CDCl<sub>3</sub> with Cr(acac)<sub>3</sub> as relaxation reagent) (all 2C unless indicated) δ 160.75 (1C, CO), 153.48, 148.55 (1C), 148.24, 148.03 (1C), 146.62, 146.56, 146.28, 146.26, 146.21, 145.66, 145.35, 145.32, 145.22, 145.15, 144.76, 144.43, 144.35, 142.94, 142.72, 142.69, 142.49, 142.32, 142.15, 141.91, 141.12, 141.06, 139.93, 139.70, 136.95 (1C, aryl C), 135.45, 134.86 (1C, aryl C), 134.47, 131.62 (1C, aryl C), 129.41 (1C, aryl C), 128.59 (1C, aryl C), 122.40 (1C, aryl C), 95.44 (1C, sp<sup>3</sup>-C of C<sub>60</sub>), 58.29 (1C, sp<sup>3</sup>-C of C<sub>60</sub>); FT-IR v/cm<sup>-1</sup> (KBr) 2921, 1732, 1640, 1509, 1449, 1295, 1126, 1037, 996, 799, 738, 528; UV-vis (CHCl<sub>3</sub>) λ<sub>max</sub>/nm (log ε) 265 (4.96), 318 (4.73), 416 (3.61), 688 (2.55); MS (ESI) m/z 840. MALDI FT-ICR MS m/z calcd for C<sub>67</sub>H<sub>4</sub>O<sub>2</sub> [M<sup>+</sup>] 840.0211, found 840.0206.

### Synthesis of C<sub>60</sub>-fused lactone **2c**.

To a solution of C<sub>60</sub> (36.0 mg, 0.05 mmol) in chlorobenzene (8 mL) was sequentially added 2-amino-5-methylbenzoic acid **1c** (37.8 mg, 0.25 mmol), Et<sub>3</sub>N (14 uL, 0.1 mmol) and isoamyl nitrite (40 uL, 0.3 mmol). After being stirred at room temperature for 4 h, the reaction mixture was filtered through a silica gel plug in order to remove any insoluble material and evaporated *in vacuo*. The residue was separated on a silica gel column with carbon disulfide as the eluent to give unreacted C<sub>60</sub> (20.2 mg, 56%), then with carbon disulfide/dichloromethane as the eluent to afford C<sub>60</sub>-fused lactone **2c** (12.8 mg, 30%).

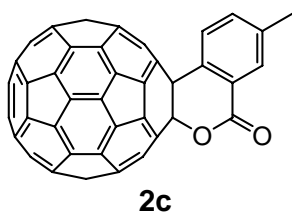

Spectral data of **2c**: <sup>1</sup>H NMR (300 MHz, CS<sub>2</sub>/CDCl<sub>3</sub>) δ 8.50 (d, *J* = 8.4 Hz, 1H), 8.42 (s, 1H), 7.69 (d, *J* = 8.1 Hz, 1H), 2.62 (s, 3H); <sup>13</sup>C NMR (75 MHz, CS<sub>2</sub>/CDCl<sub>3</sub> with

Cr(acac)<sub>3</sub> as relaxation reagent) (all 2C unless indicated)  $\delta$  160.87 (1C, CO), 153.45, 148.38 (1C), 148.11, 147.85 (1C), 146.44, 146.36, 146.10, 146.08, 146.03, 145.50, 145.14 (4C), 145.03, 145.00, 144.58, 144.28, 144.22, 142.76, 142.53, 142.51, 142.31, 142.20, 141.97, 141.73, 140.95, 140.89, 139.73, 139.54, 138.61 (1C, aryl C), 135.77 (1C, aryl C), 135.33, 134.16, 133.85 (1C, aryl C), 131.60 (1C, aryl C), 129.32 (1C, aryl C), 121.87 (1C, aryl C), 95.30 (1C, sp<sup>3</sup>-C of C<sub>60</sub>), 57.99 (1C, sp<sup>3</sup>-C of C<sub>60</sub>), 20.85 (1C, CH<sub>3</sub>); FT-IR  $\nu/\text{cm}^{-1}$  (KBr) 2915, 1729, 1615, 1507, 1418, 1311, 1253, 1192, 1150, 1080, 1049, 1000, 821, 757, 704, 585, 525; UV-vis (CHCl<sub>3</sub>)  $\lambda_{\text{max}}/\text{nm}$  (log  $\epsilon$ ) 256 (5.03), 318 (4.68), 416 (3.57), 690 (2.48); MS (ESI)  $m/z$  854. MALDI FT-ICR MS  $m/z$  calcd for C<sub>68</sub>H<sub>6</sub>O<sub>2</sub> [M<sup>+</sup>] 854.0368, found 854.0379.

### Synthesis of C<sub>60</sub>-fused lactone **2d**.

To a solution of C<sub>60</sub> (36.0 mg, 0.05 mmol) in chlorobenzene (8 mL) was sequentially added 2-amino-5-chlorobenzoic acid **1d** (42.9 mg, 0.25 mmol), Et<sub>3</sub>N (14  $\mu$ L, 0.1 mmol) and isoamyl nitrite (40  $\mu$ L, 0.3 mmol). After being stirred at 60 °C for 4 h, the reaction mixture was filtered through a silica gel plug in order to remove any insoluble material and evaporated *in vacuo*. The residue was separated on a silica gel column with carbon disulfide as the eluent to give unreacted C<sub>60</sub> (26.9 mg, 75%), then with carbon disulfide/dichloromethane as the eluent to afford C<sub>60</sub>-fused lactone **2d** (8.4 mg, 19%).

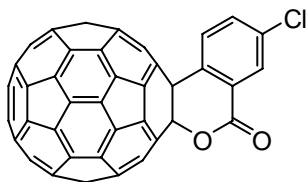

**2d**

Spectral data of **2d**: <sup>1</sup>H NMR (300 MHz, CS<sub>2</sub>/CDCl<sub>3</sub>)  $\delta$  8.59 (d,  $J$  = 8.7 Hz, 1H), 8.55 (d,  $J$  = 2.4 Hz, 1H), 7.81 (dd,  $J$  = 8.7, 2.4 Hz, 1H); <sup>13</sup>C NMR (100 MHz, CS<sub>2</sub>/CDCl<sub>3</sub> with Cr(acac)<sub>3</sub> as relaxation reagent) (all 2C unless indicated)  $\delta$  159.08 (1C, CO), 152.83, 148.37 (1C), 147.87 (1C), 147.74, 146.44, 146.41, 146.11 (4C), 146.05, 145.42, 145.23, 145.15, 145.07, 144.67, 144.59, 144.21, 144.03, 142.78, 142.57, 142.53, 142.33, 142.09, 141.94, 141.75, 140.93, 140.91, 139.81, 139.59, 135.36 (1C, aryl C), 135.17, 135.11 (1C, aryl C), 134.70 (1C, aryl C), 134.38, 130.88 (1C, aryl C), 130.83 (1C, aryl C), 123.73 (1C, aryl C), 95.35 (1C, sp<sup>3</sup>-C of C<sub>60</sub>), 57.69 (1C, sp<sup>3</sup>-C of C<sub>60</sub>); FT-IR  $\nu/\text{cm}^{-1}$  (KBr) 2934, 2858, 1736, 1678, 1638, 1511, 1446, 1406, 1308, 1263, 1248, 1206, 1145, 995, 966, 934, 904, 881, 860, 734, 577, 526; UV-vis (CHCl<sub>3</sub>)  $\lambda_{\text{max}}/\text{nm}$  (log  $\epsilon$ ) 288 (4.57), 318 (4.67), 418 (3.54), 688 (2.50); MS (ESI)  $m/z$  874. MALDI FT-ICR MS  $m/z$  calcd for C<sub>67</sub>H<sub>3</sub>ClO<sub>2</sub> [M<sup>+</sup>] 873.9822, found 873.9828.

Supplementary Material (ESI) for Chemical Communications  
This journal is © The Royal Society of Chemistry 2008

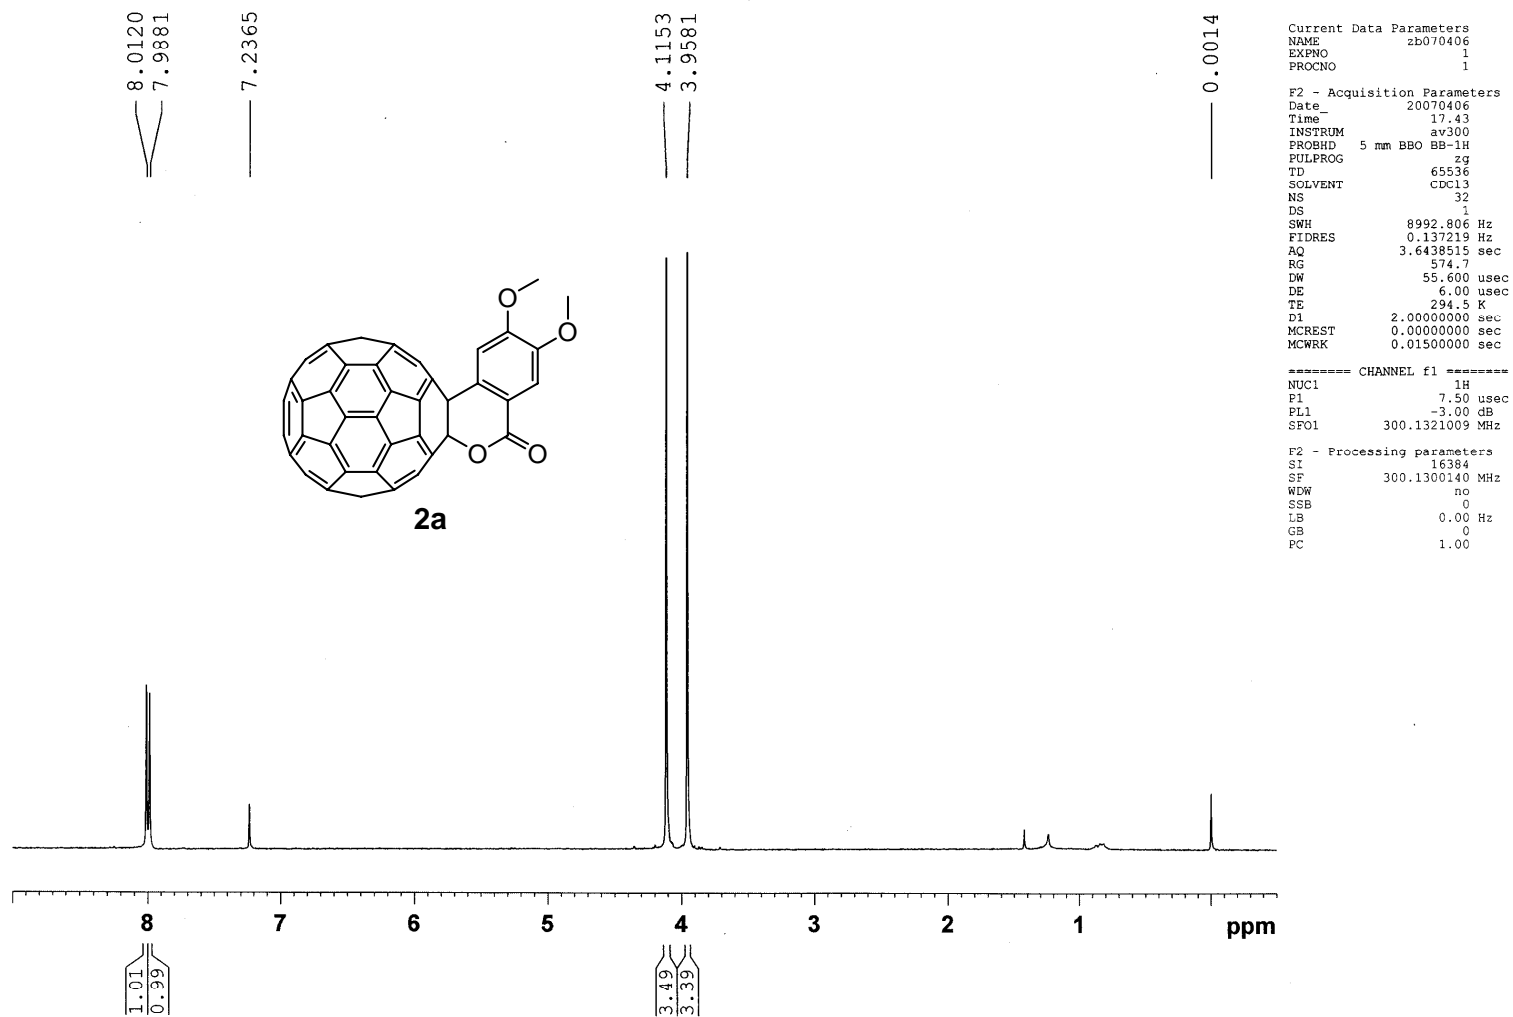

Supplementary Material (ESI) for Chemical Communications  
This journal is © The Royal Society of Chemistry 2008

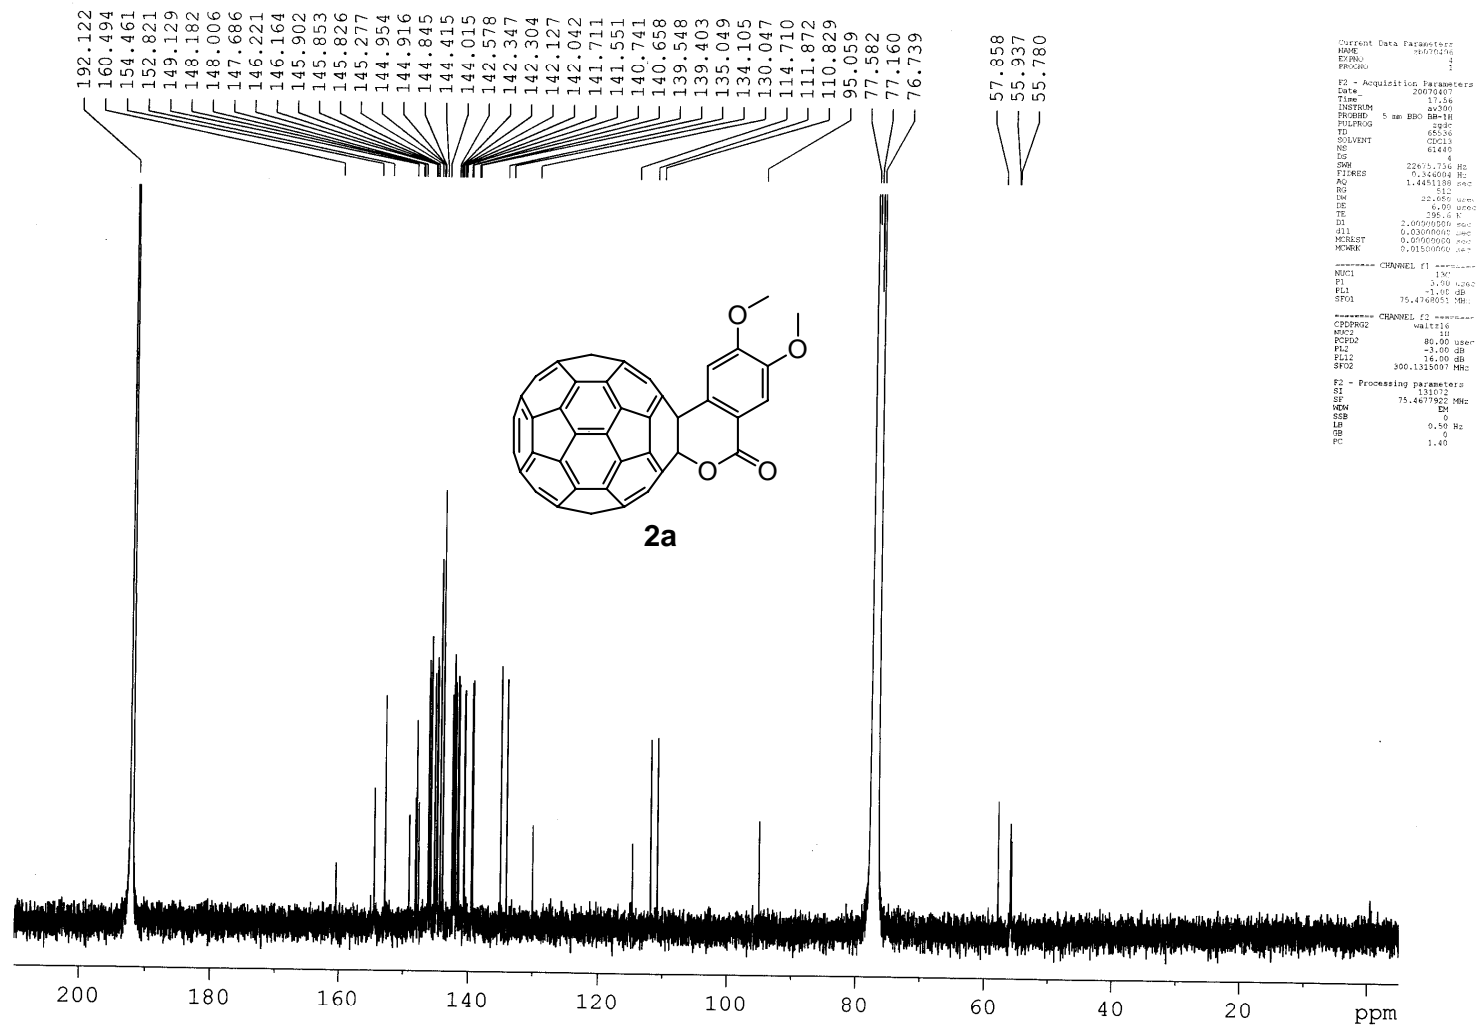

Supplementary Material (ESI) for Chemical Communications  
This journal is © The Royal Society of Chemistry 2008

8.587  
8.582  
8.561  
8.556  
7.896  
7.891  
7.871  
7.867  
7.845  
7.840  
7.736  
7.732  
7.709  
7.685  
7.682  
7.236  
7.205

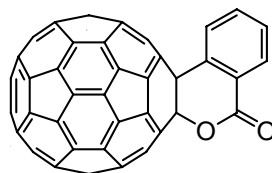

2b

0.000

```
Current Data Parameters
NAME      zb08101002
EXPNO    1
PROCNO   1

F2 - Acquisition Parameters
Date      20081010
Time     16.45
INSTRUM  av300
PROBHD   5 mm BBO BB-1H
PULPROG  zg
TD       32768
SOLVENT  CDCl3
NS       88
DS       1
SWH      5995.204 Hz
FIDRES   0.182959 Hz
AQ       2.7329011 sec
RG       812.7
DW       83.400 usec
DE       6.00 usec
TE       300.0 K
D1       2.0000000 sec
MCREST   0.0000000 sec
MCWRK    0.0150000 sec

===== CHANNEL f1 =====
NUC1      1H
P1        13.00 usec
PL1       2.00 dB
SFO1      300.1321009 MHz

F2 - Processing parameters
SI        16384
SF        300.1300227 MHz
WDW       EM
SSB       0
LB        0.30 Hz
GB        0
PC        1.00
```

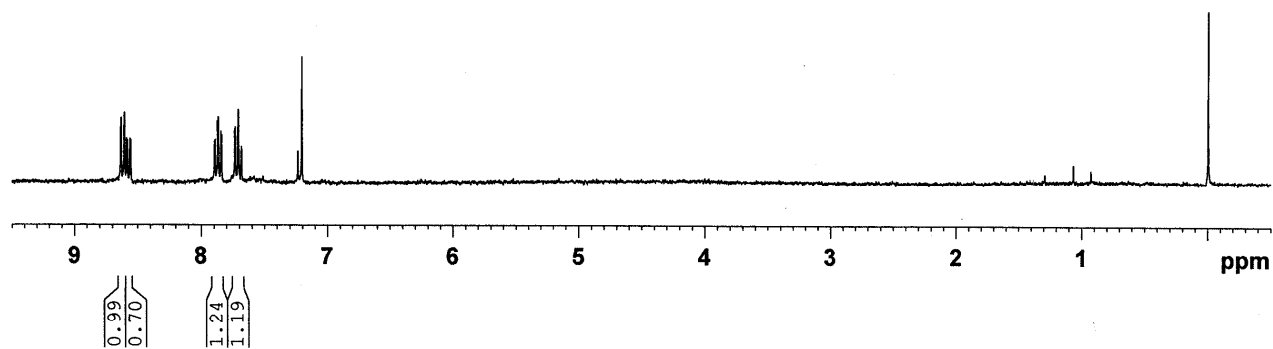

Supplementary Material (ESI) for Chemical Communications  
 This journal is © The Royal Society of Chemistry 2008

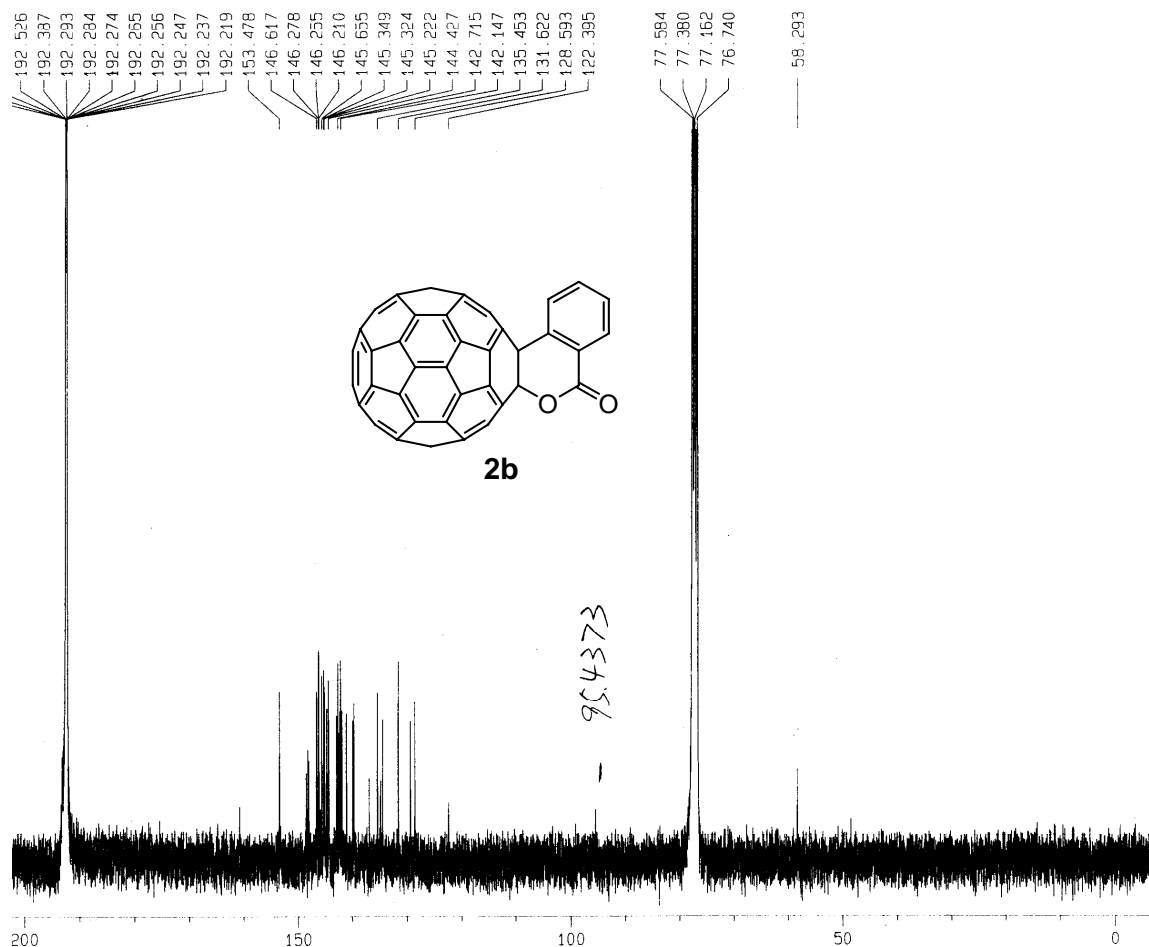

```

Current Data Parameters
NAME          zb070914
EXPNO         4
PROCNO        1

F2 - Acquisition Parameters
Date_         20070914
Time          19.40
INSTRUM       av300
PROBHD        5 mm BBO BB-1H
PULPROG       zgdc
TD            65536
SOLVENT       CDC13
NS            64275
DS            4
SWH           22675.736 Hz
FIDRES        0.346004 Hz
AQ            1.4451188 sec
RG            7298.2
DW            22.050 usec
DE            6.00 usec
TE            300.0 K
D1            2.00000000 sec
d11           0.03000000 sec
YCREST        0.00000000 sec
YCWK          0.01500000 sec

===== CHANNEL f1 =====
NUC1          13C
P1            3.00 usec
PL1           -1.00 dB
SFO1          75.4768051 MHz

===== CHANNEL f2 =====
CPDPRG2       waltz16
NUC2          1H
PCPD2         80.00 usec
PL2           -3.00 dB
PL12          16.00 dB
SFO2          300.1315007 MHz

F2 - Processing parameters
SI            131072
SF            75.4677656 MHz
WDW           EM
SSB           0
LB            0.50 Hz
GB            0
PC            1.40

1D NMR plot parameters
CX            22.00 cm
CY            0.00 cm
F1P           219.460 ppm
F1            16562.13 Hz
F2P           -8.038 ppm
F2            -606.64 Hz
PPMCM         10.34082 ppm/cm
HZCM          780.39874 Hz/cm
    
```



Supplementary Material (ESI) for Chemical Communications  
This journal is © The Royal Society of Chemistry 2008

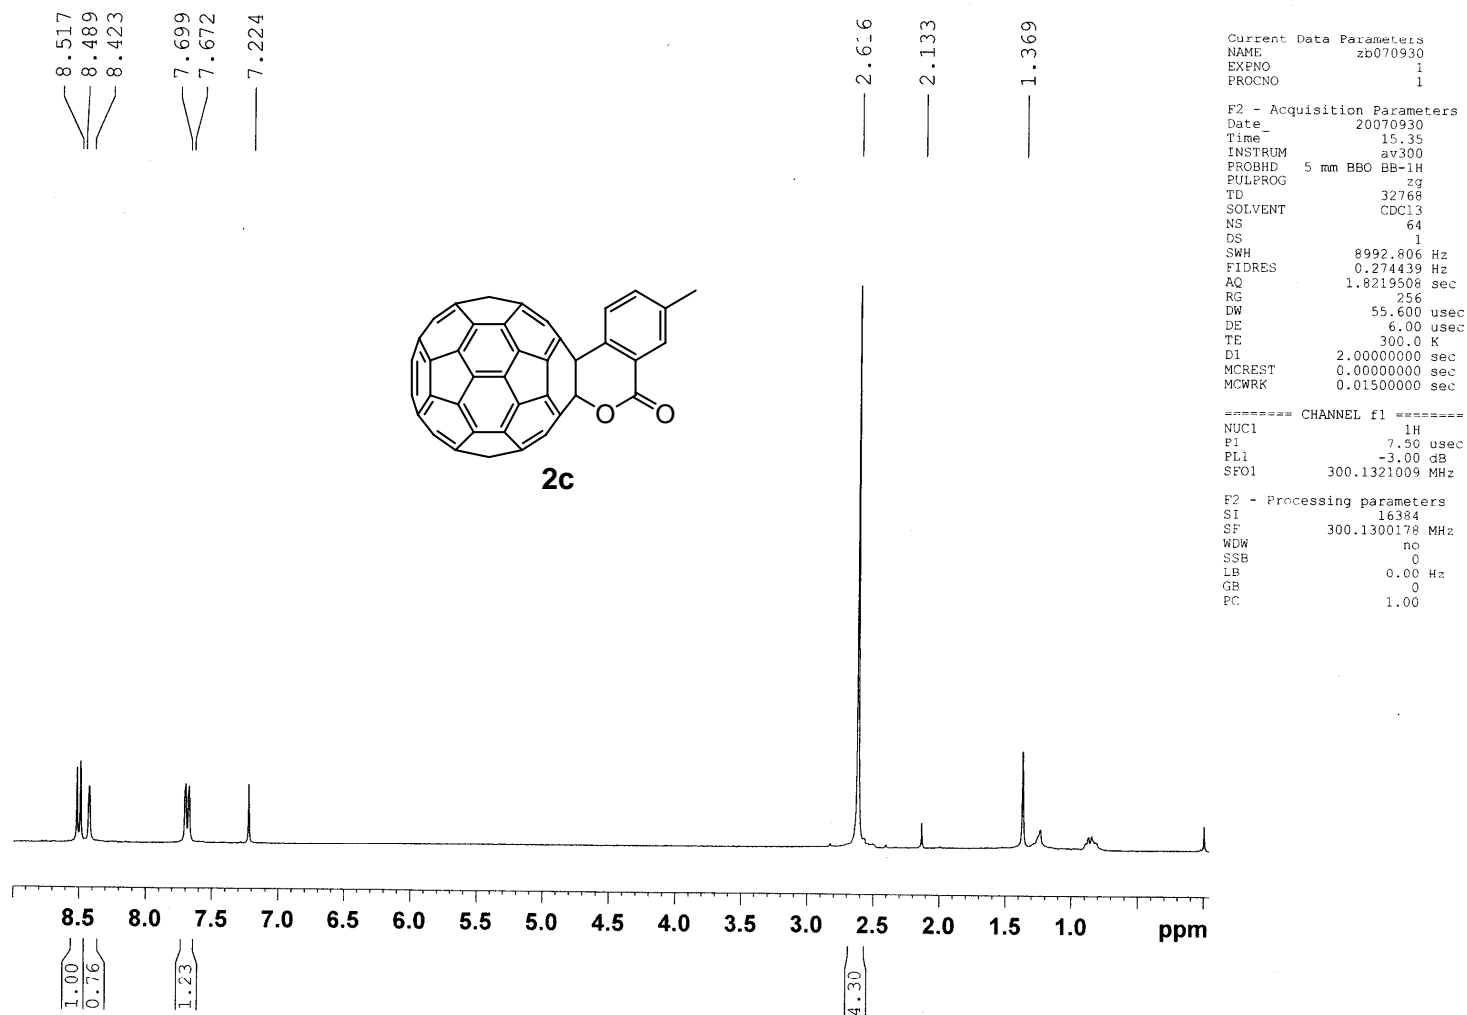

Supplementary Material (ESI) for Chemical Communications  
 This journal is © The Royal Society of Chemistry 2008

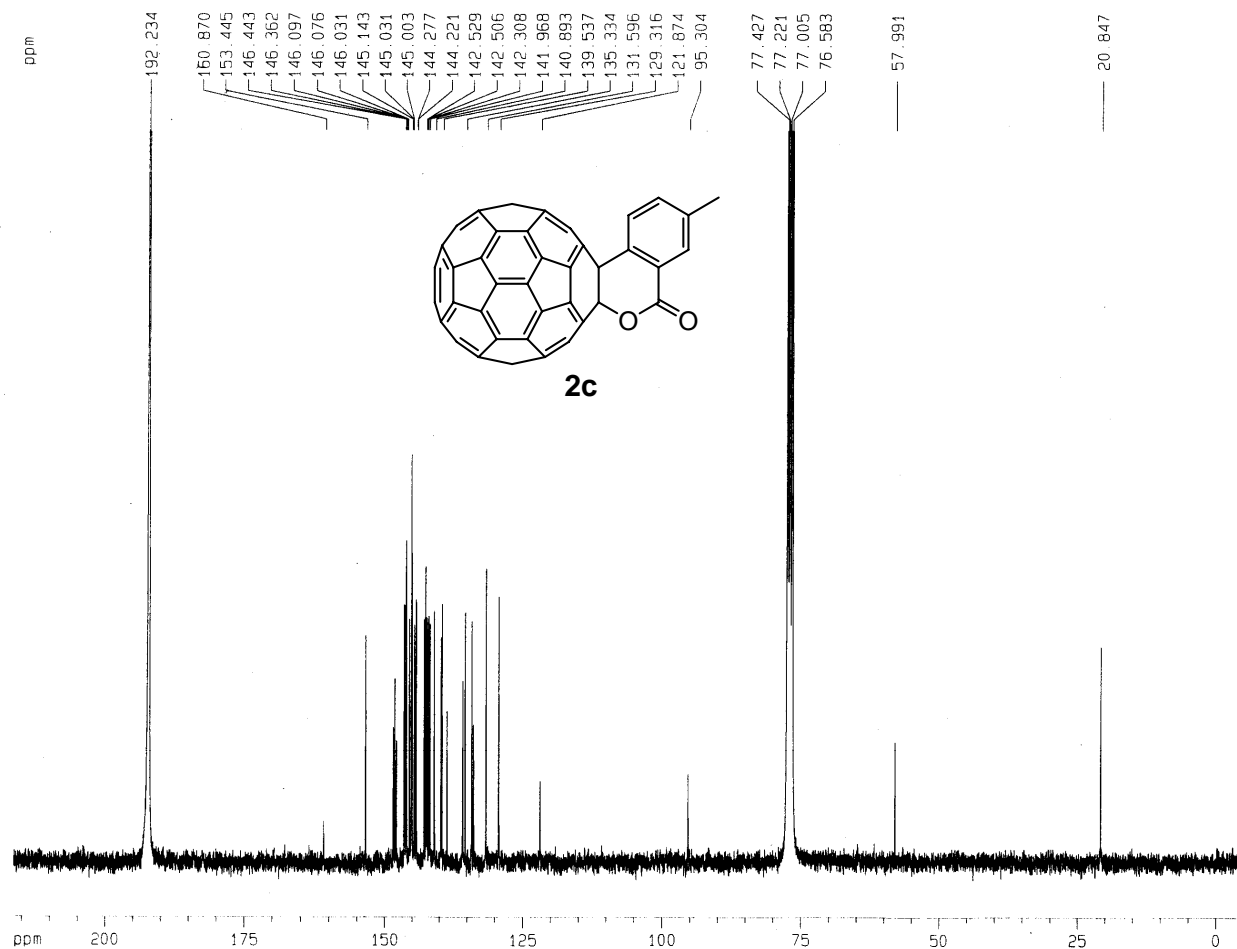

Current Data Parameters  
 NAME z6070930  
 EXPNO 4  
 PROCNO 1

F2 - Acquisition Parameters  
 Date\_ 20071002  
 Time 19.04  
 INSTRUM av300  
 PROBHD 5 mm BBO BB-1H  
 PULPROG zgpg  
 TD 65536  
 SOLVENT CDCl3  
 NS 51200  
 DS 4  
 SWH 22675.736 Hz  
 FIDRES 0.346004 Hz  
 AQ 1.4451188 sec  
 RG 9195.2  
 DW 22.050 usec  
 DE 6.00 usec  
 TE 300.0 K  
 D1 2.00000000 sec  
 d11 0.03000000 sec  
 MCREST 0.00000000 sec  
 MLWHK 0.01500000 sec

===== CHANNEL f1 =====  
 NUC1 13C  
 P1 3.00 usec  
 PL1 -1.00 dB  
 SFO1 75.4768051 MHz

===== CHANNEL f2 =====  
 CPDPRG2 waltz16  
 NUC2 1H  
 PCPD2 80.00 usec  
 PL2 -3.00 dB  
 PL12 16.00 dB  
 SFO2 300.1315007 MHz

F2 - Processing parameters  
 SI 131072  
 SF 75.4677771 MHz  
 WDW EM  
 SSB 0  
 LB 1.00 Hz  
 GB 0  
 PC 1.40

1D NMR plot parameters  
 CX 22.00 cm  
 CY 0.00 cm  
 F1P 216.445 ppm  
 F1 16334.62 Hz  
 F2P -5.807 ppm  
 F2 -438.23 Hz  
 PPMCM 10.10235 ppm/cm  
 HZCM 762.40210 Hz/cm

Supplementary Material (ESI) for Chemical Communications  
This journal is © The Royal Society of Chemistry 2008

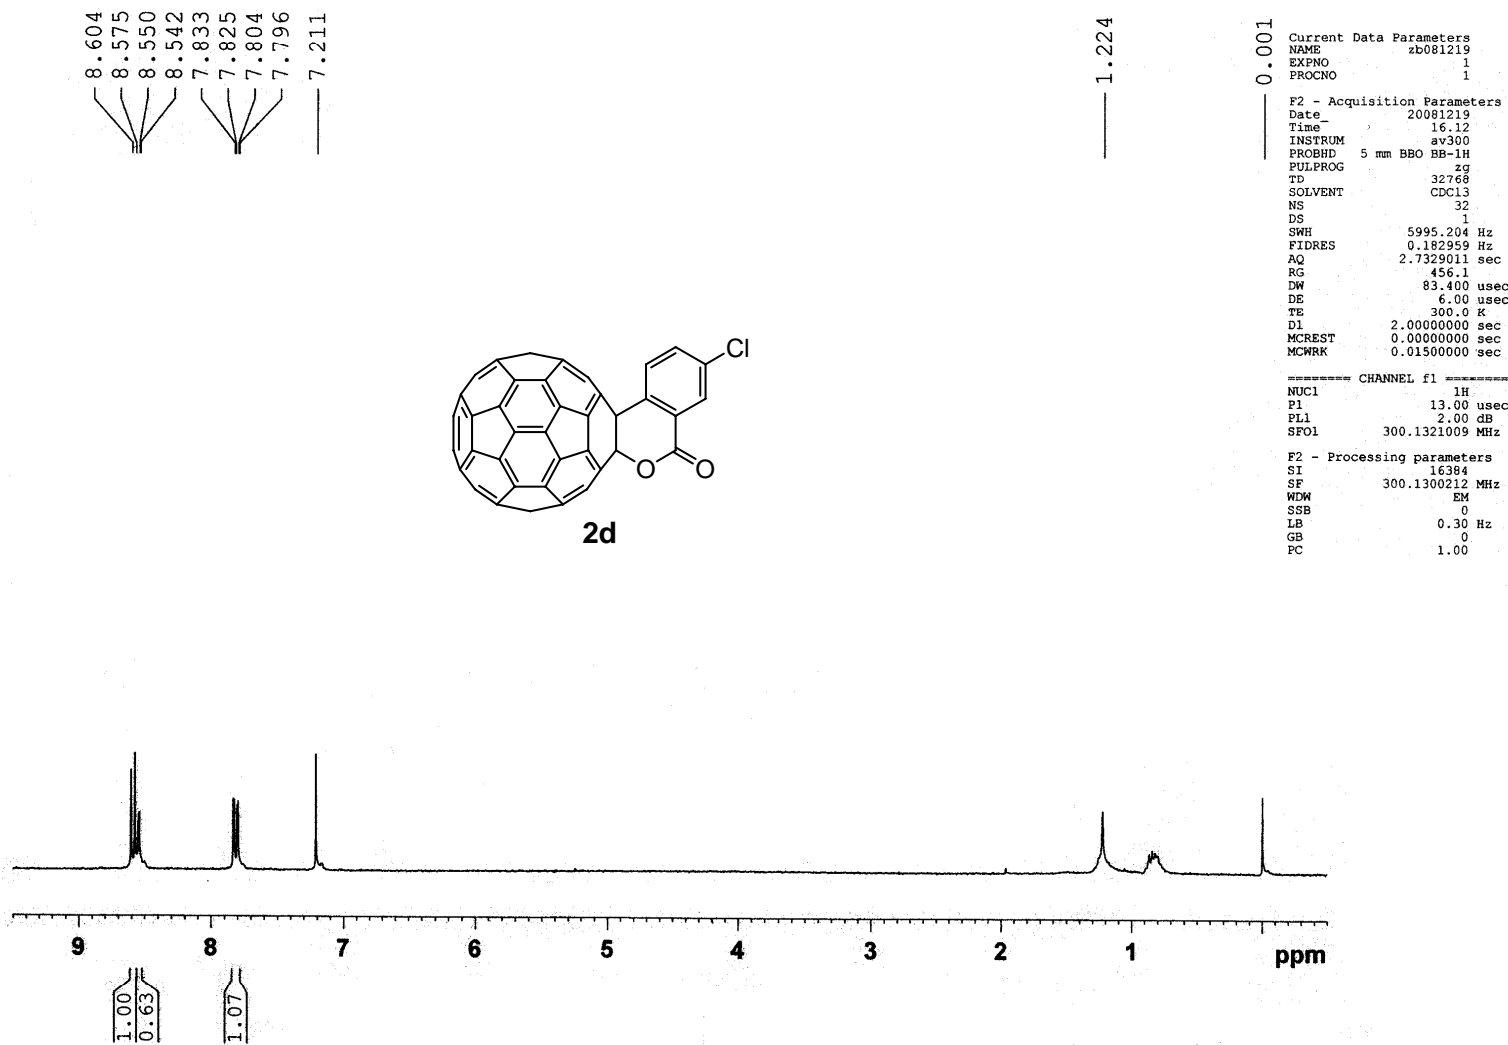

Supplementary Material (ESI) for Chemical Communications  
 This journal is © The Royal Society of Chemistry 2008

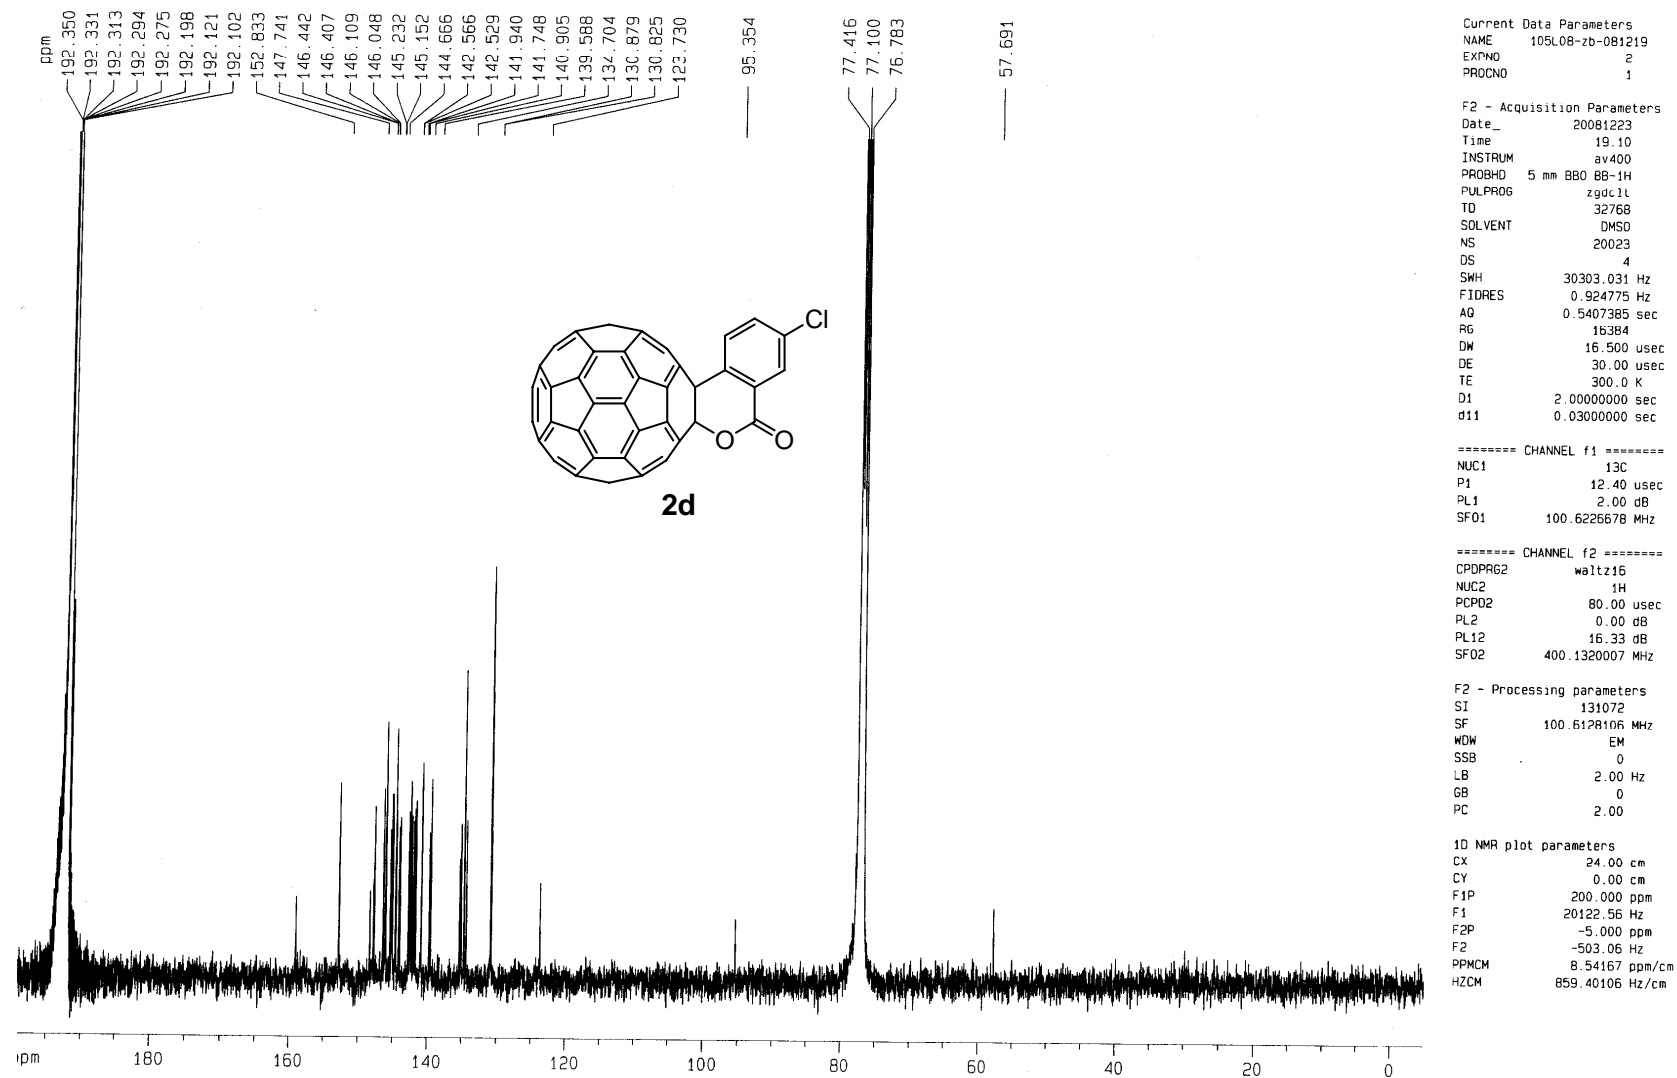

Supplement: b820395d.pdf [file b820395d.pdf]
